# Supplementary material for: Role of synthesis variables on controlled nucleation and growth of hexagonal molybdenum oxide nanocrystals: investigation on thermal and optical properties
Source: Royal Society of Chemistry journal article supplement (doi:10.1039/c4ce00418c), 2014-01-01
Supplement: c4ce00418c1.pdf [file c4ce00418c1.pdf]

ARTICLE

# Role of synthesis variables on controlled nucleation and growth of hexagonal molybdenum oxide nanocrystals: Investigation on thermal and optical properties

A. Chithambararaj<sup>a</sup> and A. Chandra Bose<sup>a</sup>

<sup>a</sup> Nanomaterials Laboratory, Department of Physics, National Institute of Technology, Tiruchirappalli – 620 015, India. E-mail: acbose@nitt.edu

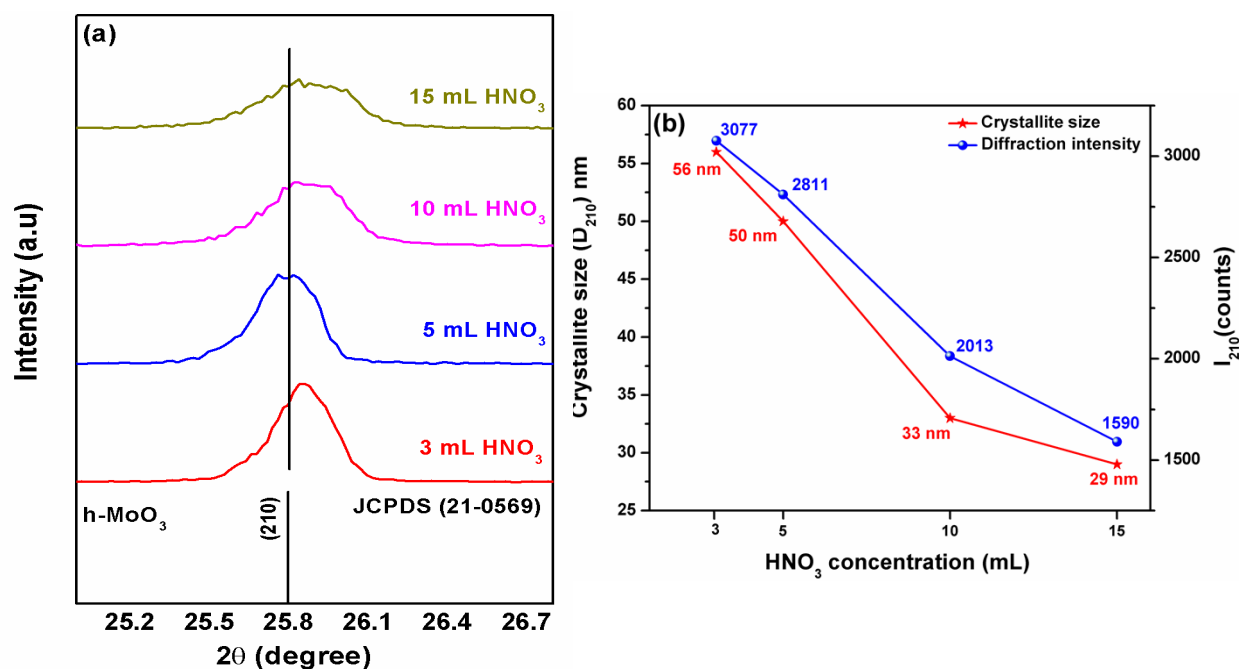

(ESI†) S1(a) The peak shift analysis of as-synthesized h-MoO<sub>3</sub> samples prepared with different HNO<sub>3</sub> concentrations; (b) variation of diffraction peak intensity and crystallite size with respect to HNO<sub>3</sub> concentration

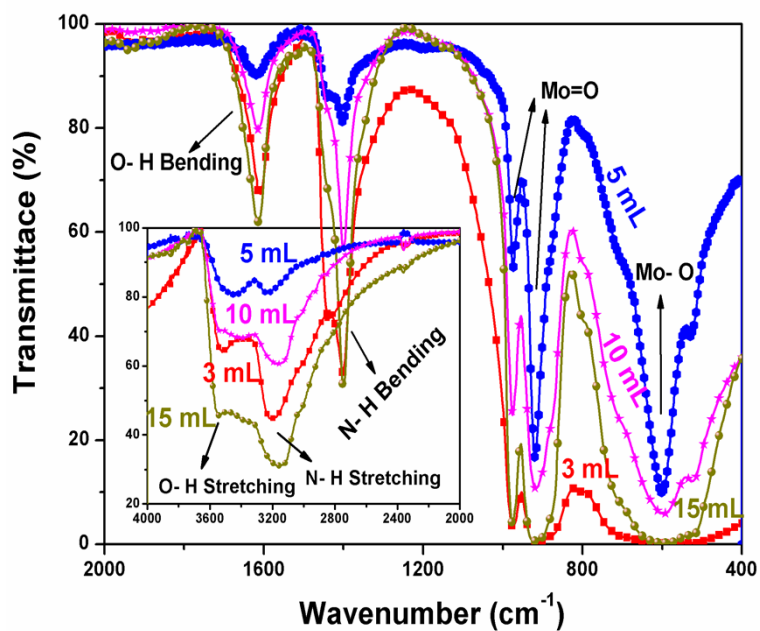

(ESI<sup>†</sup>) S2 The FT-IR spectra of as-synthesized h-MoO<sub>3</sub> samples prepared with different HNO<sub>3</sub> concentrations

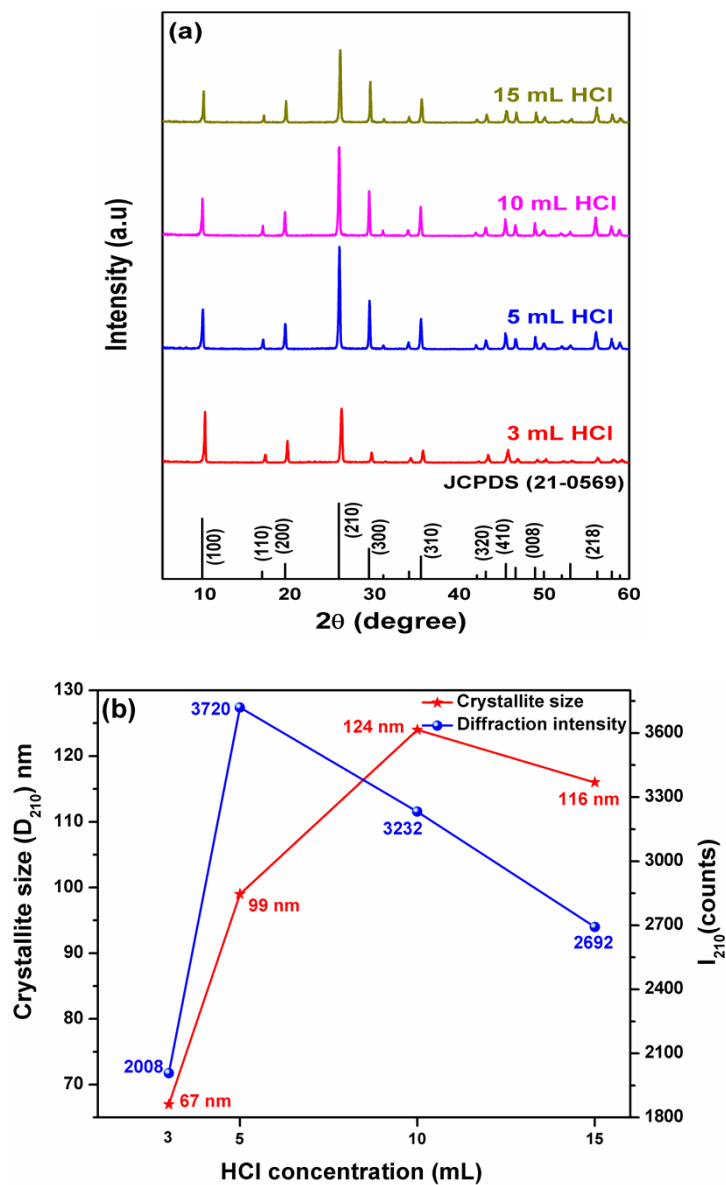

(ESI†) S3(a) XRD patterns of as-synthesized h-MoO<sub>3</sub> sample prepared with different HCl concentrations; (b) variation of diffraction peak intensity and crystallite size with respect to HCl concentration

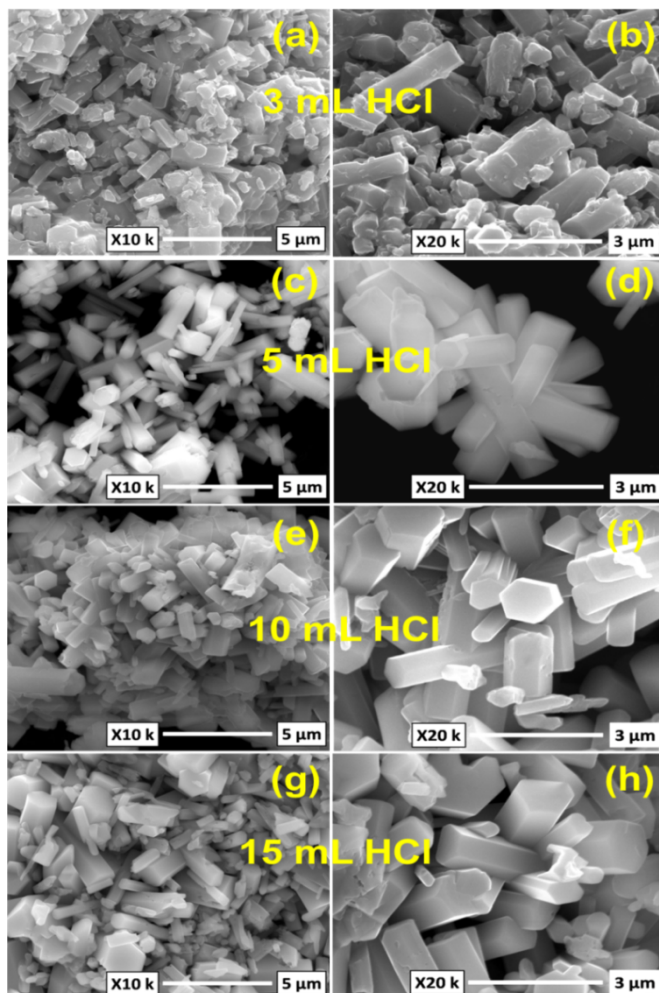

(ESI<sup>†</sup>) S4 SEM images of as-synthesized h-MoO<sub>3</sub> samples prepared with (a, b) 3 mL; (c, d) 5 mL; (e, f) 10 mL and (g, h) 15 mL HCl concentrations

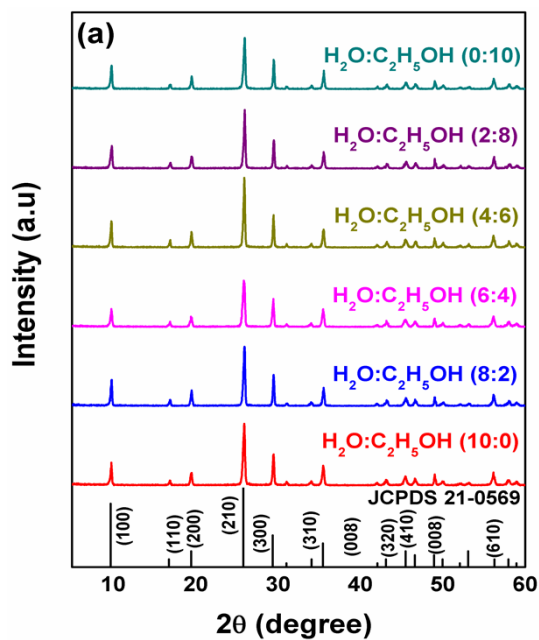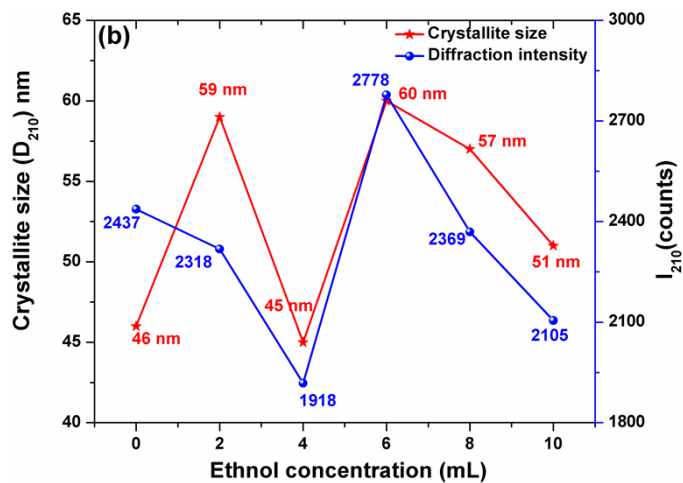

**(ESI†) S5(a)** XRD pattern of as-synthesized h-MoO<sub>3</sub> samples synthesized using water/ethanol combination; **(b)** variation of diffraction peak intensity and crystallite size with respect to ethanol concentration

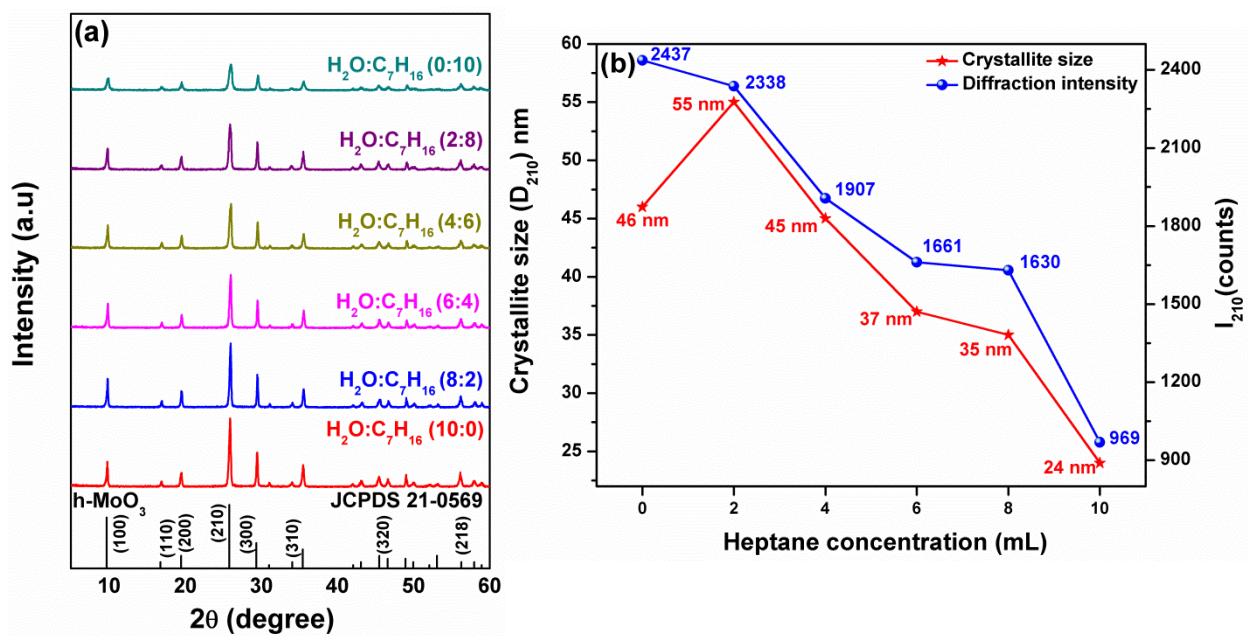

**(ESI†) S6(a)** XRD pattern of as-synthesized h-MoO<sub>3</sub> samples synthesized using the water / heptane combination;  
**(b)** variation of diffraction peak intensity and crystallite size with respect to heptane concentration



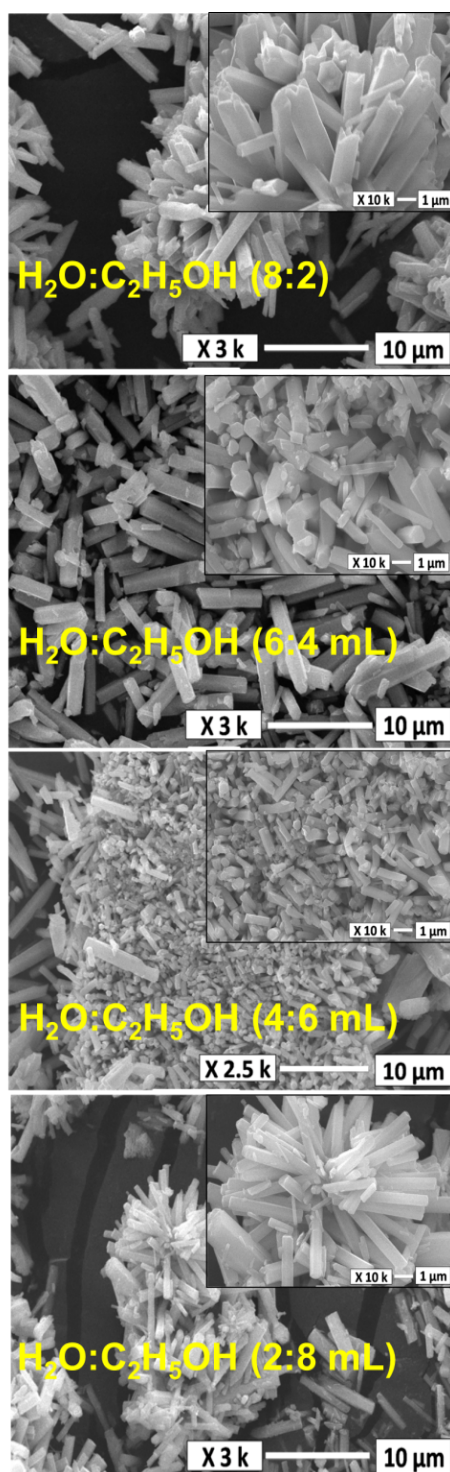

(ESI†) S7 SEM images of as-synthesized h-MoO<sub>3</sub> samples synthesized using water/ethanol compositions

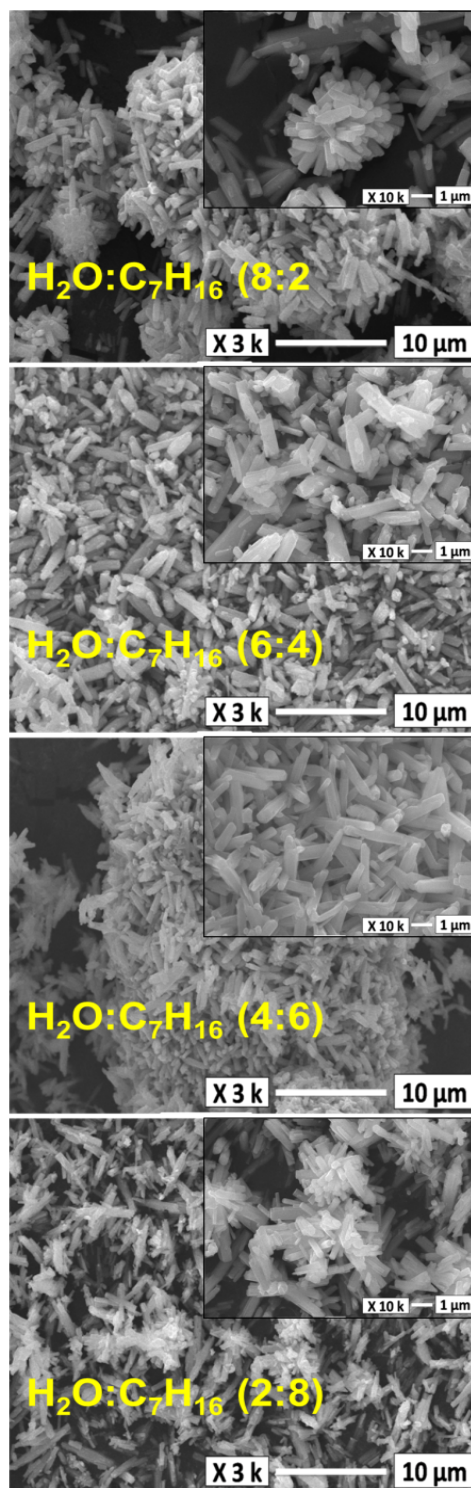

(ESI<sup>+</sup>) S8 SEM images of as-synthesized h-MoO<sub>3</sub> samples synthesized using water/heptane compositions

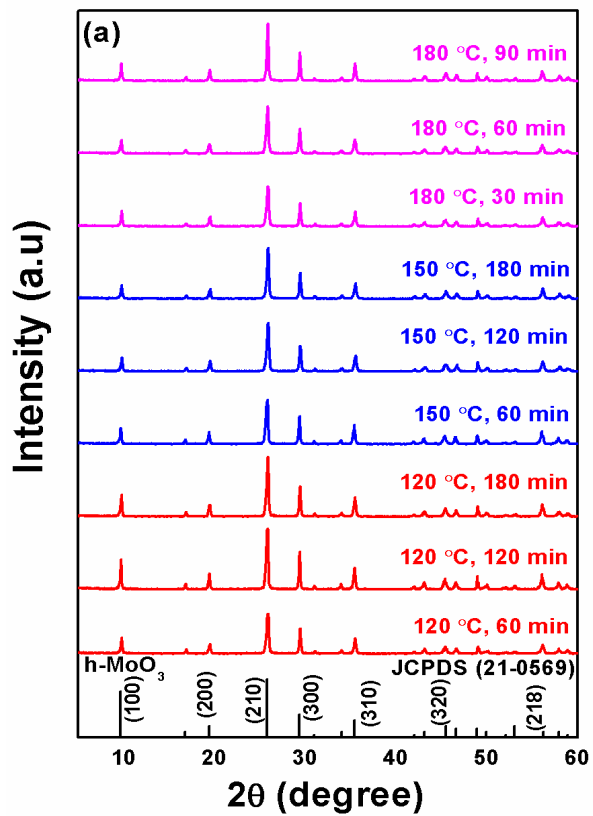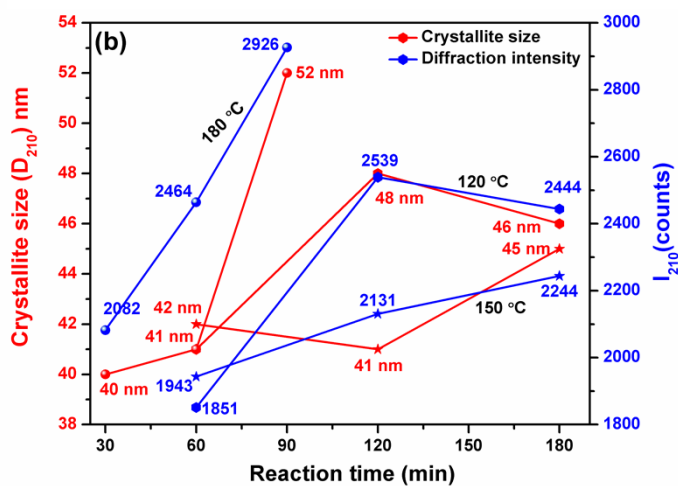

**(ESI†) S9(a)** XRD patterns of h-MoO<sub>3</sub> samples synthesized at different reaction time and reaction temperature;  
**(b)** Variation of diffraction peak intensity and crystallite size with respect to reaction time and reaction temperature

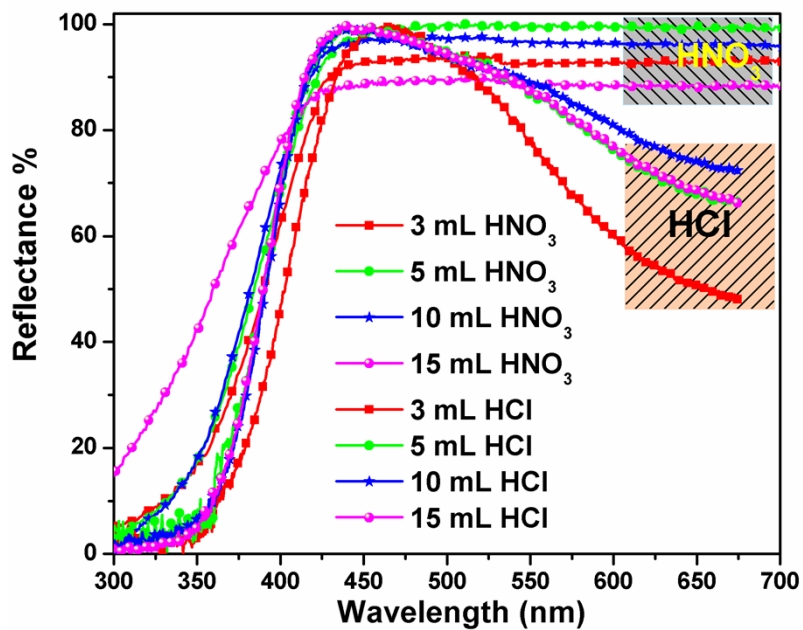

(ESI<sup>+</sup>) S10 UV-Vis diffuse reflectance spectra of samples obtained for different HNO<sub>3</sub> and HCl concentrations

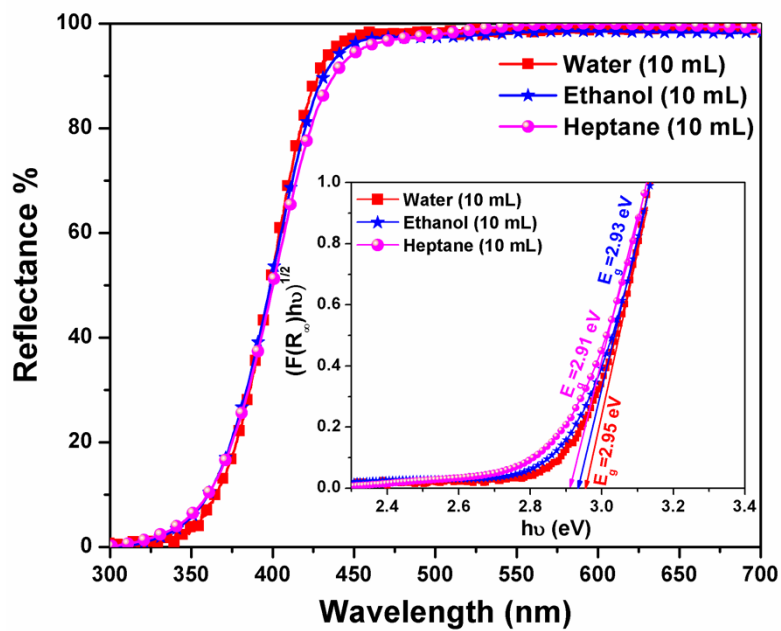

(ESI<sup>†</sup>) S11 UV-Vis diffuse reflectance spectra of as-synthesized h-MoO<sub>3</sub> samples synthesized under water, ethanol and heptane as solvent medium; inset shows the band gap of h-MoO<sub>3</sub>
